# Supplementary material
Source: PubMed Central journal article supplement (PMC2662169)
Supplement: M803895200_1.pdf [file M803895200_1.pdf]

TABLE 1

Oligonucleotides used to amplify the *PED/PEA-15* promoter, and for Real-Time, EMSA and ChIP analyses. Underlined nucleotides represent restriction sites used to clone the PCR fragments, whereas bases in boldface type correspond to the HNF-4 $\alpha$  response element, and nucleotides in italic correspond to mutated bases.

The *UGT1A9* primers derive from Barbier O et al. 2005 {Barbier, 2005 #62}

---

|                                      |                                              |
|--------------------------------------|----------------------------------------------|
| <b>Promoter cloning</b>              |                                              |
| Ped2000 Kpnl                         | 5'-CGATCGGTACCTACAGGTGCCACCACCACACTCAGCTA-3  |
| Ped1600 Kpnl                         | 5'-CGATCGGTACCAAGGCCCGGTCTAAATAATAGCTCCTA-3  |
| Ped1100 Kpnl                         | 5'-CGATCGGTACCGATCCTGGAAGTGGCACAACACTGAGG-3  |
| Ped600 Kpnl                          | 5'-CGATCGGTACCAACCCCTCACTCCCAATGTGGATAAGTC-3 |
| Ped477 Kpnl                          | 5'-CGATCGGTACCAAGCAGCTAAGAGAATCCAGCCCCAAAG-3 |
| Ped367 Kpnl                          | 5'-CGATCGGTACCGGAGGTGCCCTACTGGGTAAGAATTAA-3  |
| Ped288 Kpnl                          | 5'-CGATCGGTACCCCTCCGCCAATCTGTCCCCATCCTA-3    |
| Ped210 Kpnl                          | 5'-CGATCGGTACCCATCCCTCCCTCCCTCCCGCCATTC-3    |
| Ped97 Kpnl                           | 5'-CGATCGGTACCCGGAAAGAGGCGGGCGGGCGGAGCAAGC-3 |
| Ped (XhoI) antisense                 | 5'-CGATCCCTCGAGGCACTCTGAGTCCCCGGTTCCTAAGCA-3 |
| <b>REAL-TIME PCR</b>                 |                                              |
| Ped/Pea-15 sense                     | 5'-TTCCCGCTGTTCCCTTAGG-3'                    |
| Ped/Pea-15 antisense                 | 5'-TCTGGCTCATCCGCATCC-3'                     |
| $\beta$ -Actin sense                 | 5'-GCGTGACATCAAAGAGAAG-3'                    |
| $\beta$ -Actin antisense             | 5'-ACTGTGTTGGCATAGAGG-3'                     |
| HNF-4 $\alpha$ sense                 | 5'-GGGCTAAGAAAGAAGGCAGGAG-3'                 |
| HNF-4 $\alpha$ antisense             | 5'-ACATCGTCAATCACCTCACTGG-3'                 |
| CEACAM sense                         | 5'-TGCTCACAGCCTCACTTCTAAC-3'                 |
| CEACAM antisense                     | 5'-TTGACGGTTGCCATCCATC-3'                    |
| ApoC3 sense                          | 5'-CCAAGTCCACCTGCCTATC-3'                    |
| ApoC3 antisense                      | 5'-AGGAGAGCACTGAGAACTAG-3'                   |
| ApoA1 sense                          | 5'-CGTGACCTCCACCTTCAG-3'                     |
| ApoA1 antisense                      | 5'-CACCTCTCCAGATCCTTG-3'                     |
| Albumin sense                        | 5'-TTGCCAGAAGACATCCTTAC-3'                   |
| Albumin antisense                    | 5'-AAGCCTTCCCTTCACTCC-3'                     |
| OTC sense                            | 5'-ACTCAGGGTGTCACTACTAC-3'                   |
| OTC antisense                        | 5'-AAGGCACTGCGGTACTGG-3'                     |
| <b>EMSA</b>                          |                                              |
| GR-HNF4 $\alpha$ sense               | 5'-GGTCATCCAAGGTCAAAGGGGAGG-3'               |
| GR-HNF4 $\alpha$ antisense           | 5'-CCTCCCTTTTGACCTTTGGATGACC-3'              |
| GR-HNF4 $\alpha$ mut sense           | 5'-CGTGGTCATCCCGGGTCAAAGGGG-3'               |
| GR-HNF4 $\alpha$ mut antisense       | 5'-CCCCTTTTGACCGGGGGATGACCACG-3'             |
| <b>Chromatin Immunoprecipitation</b> |                                              |
| Ped sense                            | 5'-CCCCCTAAACCAACCTACTCT-3'                  |
| Ped antisense                        | 5'-CCCCCTGAACCTGCGAAACAAT-3'                 |
| UGT1A9 sense                         | 5'-TGAGTTGCCATCTTCTCTGG-3'                   |
| UGT1A9 antisense                     | 5'-ATGCTTTTGGACCTTGAAGGT-3'                  |
| $\beta$ -Globin sense                | 5'-AGGCTGCTGTTGTCTACCTTG-3'                  |
| $\beta$ -Globin antisense            | 5'-AGCTCACTGAGGCTGGCAAAGGTG-3'               |

---
